# Supplementary material
Source: ML conference proceedings conference paper supplement (https://openreview.net/forum?id=LB5cKhgOTu)

o\_proj (Layer 0)

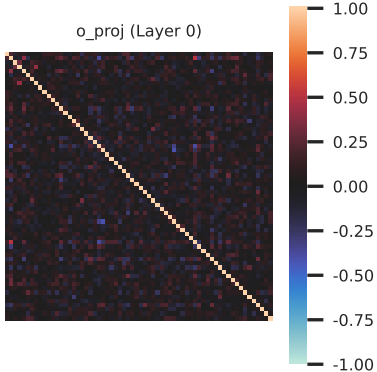

o\_proj (Layer 3)

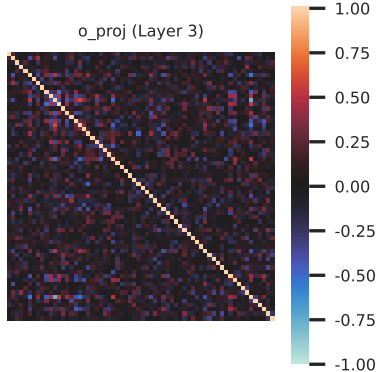

o\_proj (Layer 7)

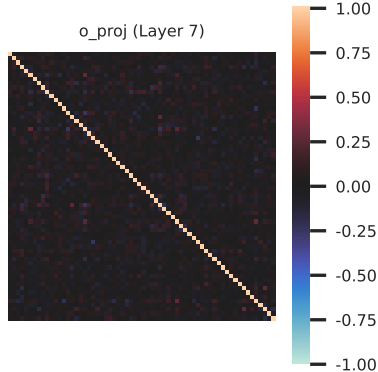

o\_proj (Layer 11)

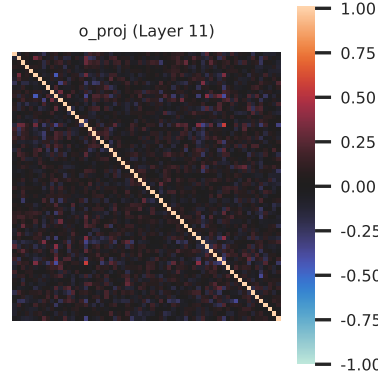

o\_proj (Layer 15)

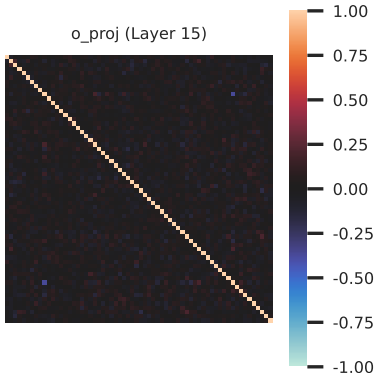

o\_proj (Layer 19)

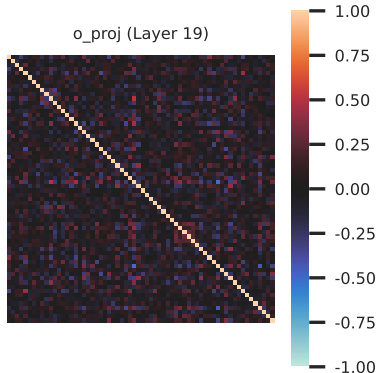

o\_proj (Layer 23)

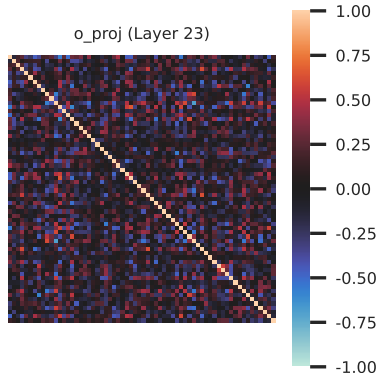

o\_proj (Layer 27)

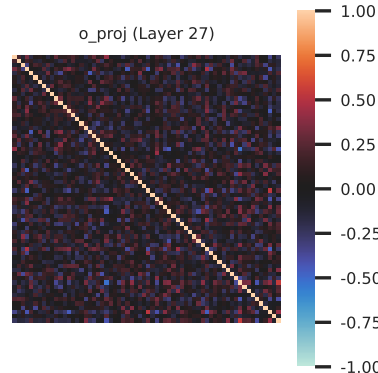

o\_proj (Layer 31)

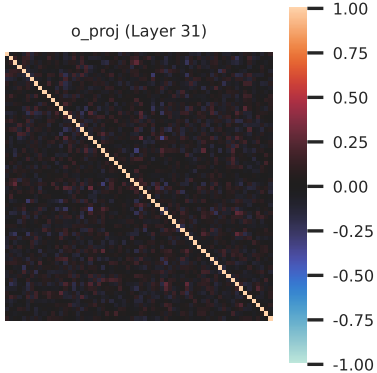

Supplement: supplementary_material [file attachment]
