# Supplementary material
Source: ML conference proceedings conference paper supplement (https://openreview.net/forum?id=LB5cKhgOTu)

down\_proj (Layer 0)

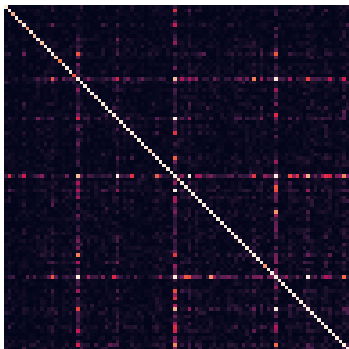

down\_proj (Layer 3)

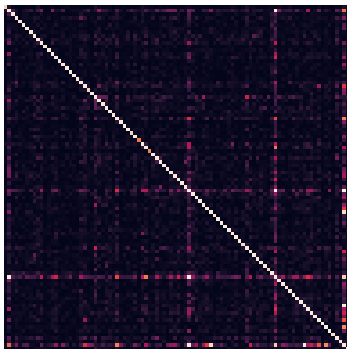

down\_proj (Layer 7)

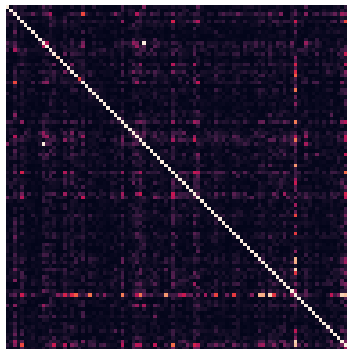

down\_proj (Layer 11)

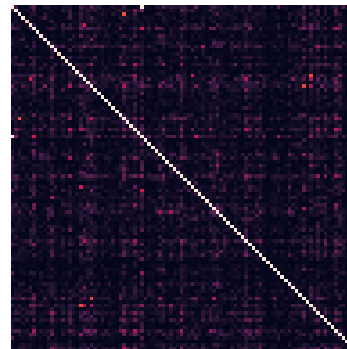

down\_proj (Layer 15)

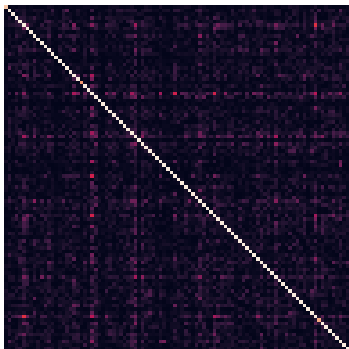

down\_proj (Layer 19)

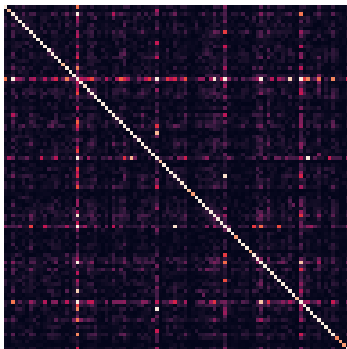

down\_proj (Layer 23)

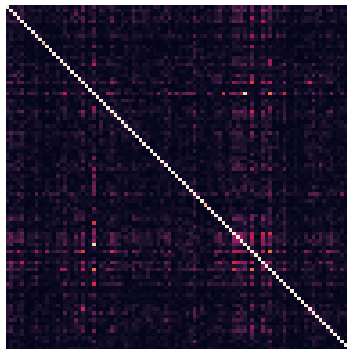

down\_proj (Layer 27)

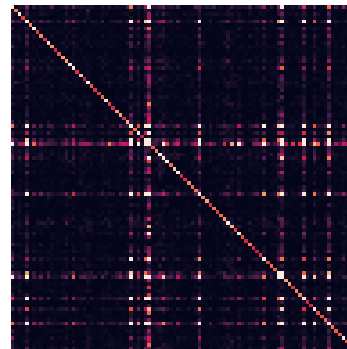

down\_proj (Layer 31)

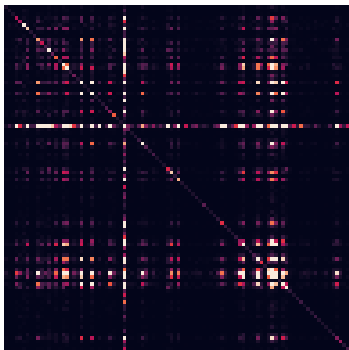

Supplement: supplementary_material [file attachment]
