# Supplementary material
Source: ML conference proceedings conference paper supplement (https://openreview.net/forum?id=LB5cKhgOTu)

k\_proj (Layer 0)

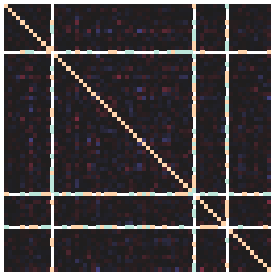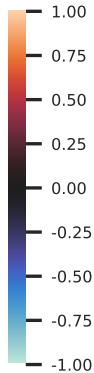

k\_proj (Layer 3)

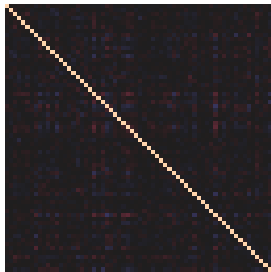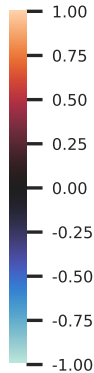

k\_proj (Layer 7)

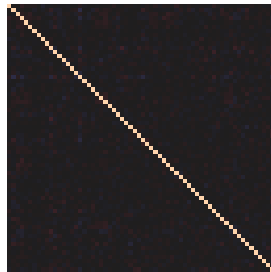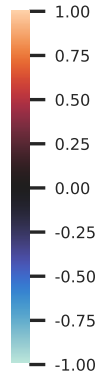

k\_proj (Layer 11)

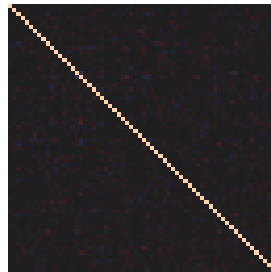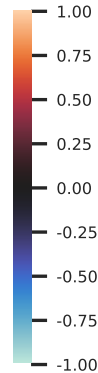

k\_proj (Layer 15)

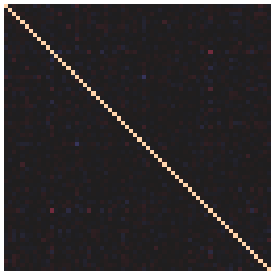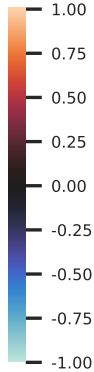

k\_proj (Layer 19)

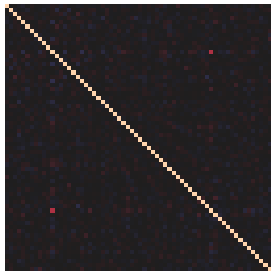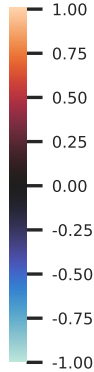

Supplement: supplementary_material [file attachment]

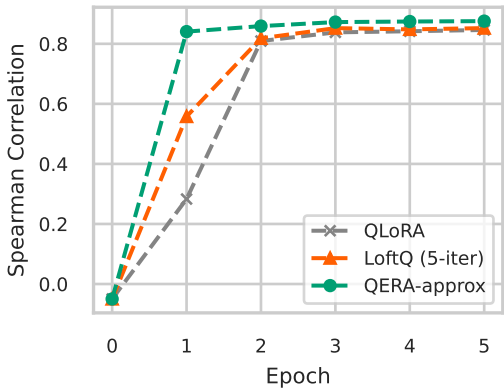

Supplement: supplementary_material [file attachment]

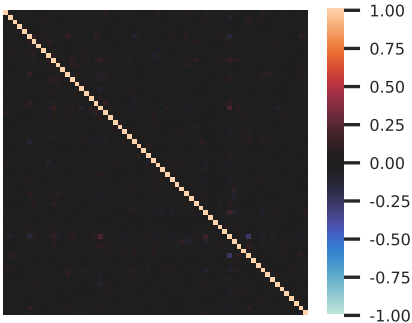

Supplement: supplementary_material [file attachment]

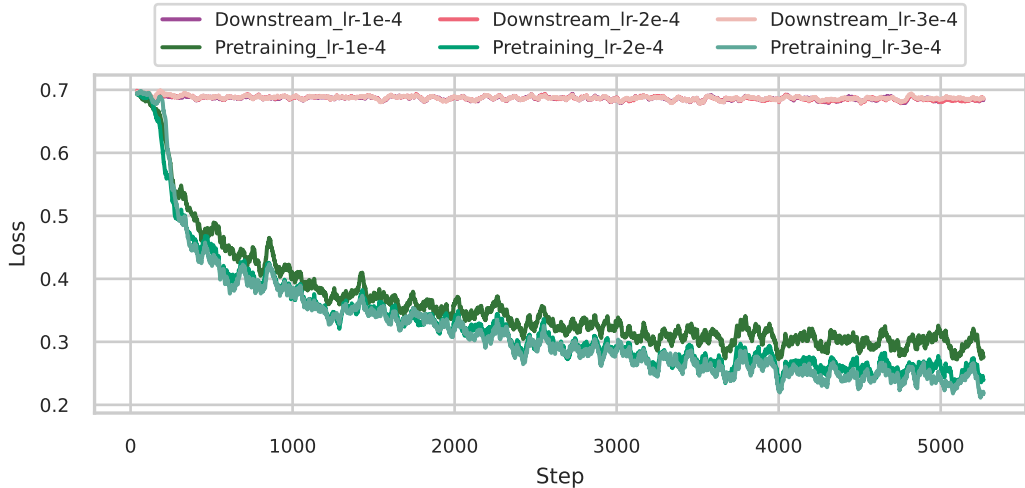

Supplement: supplementary_material [file attachment]

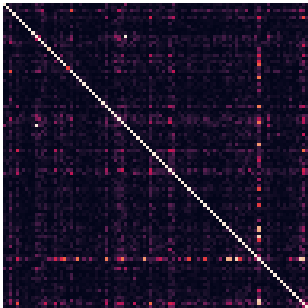

Supplement: supplementary_material [file attachment]

o\_proj (Layer 0)

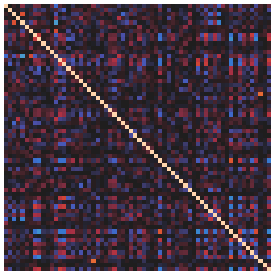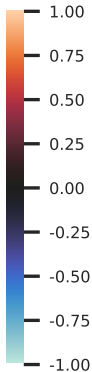

o\_proj (Layer 3)

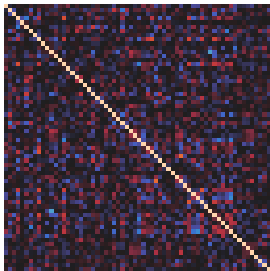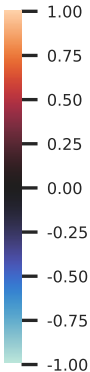

o\_proj (Layer 7)

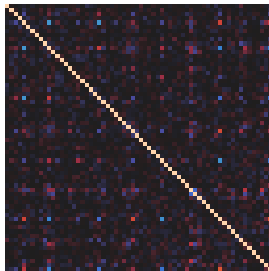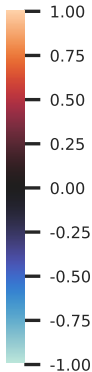

o\_proj (Layer 11)

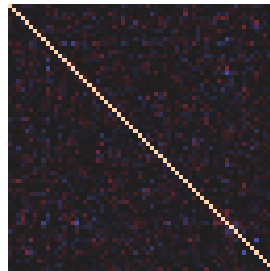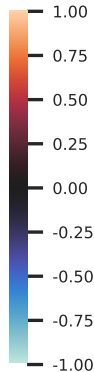

o\_proj (Layer 15)

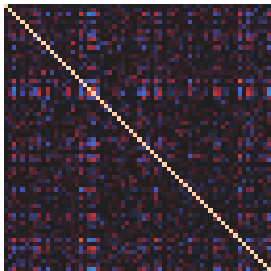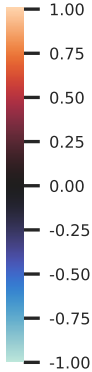

o\_proj (Layer 19)

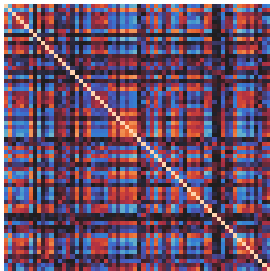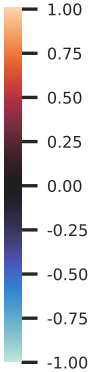

Supplement: supplementary_material [file attachment]

Accuracy

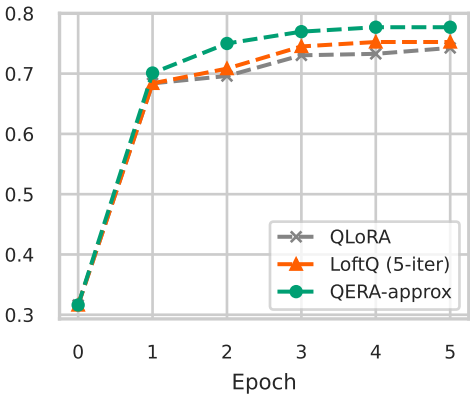

Supplement: supplementary_material [file attachment]

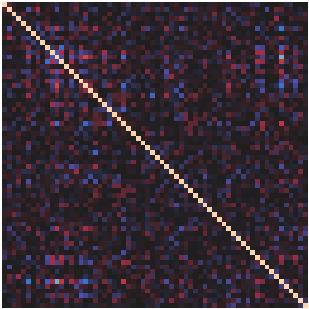

Supplement: supplementary_material [file attachment]

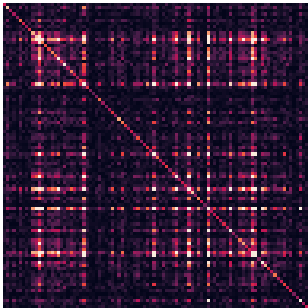

Supplement: supplementary_material [file attachment]

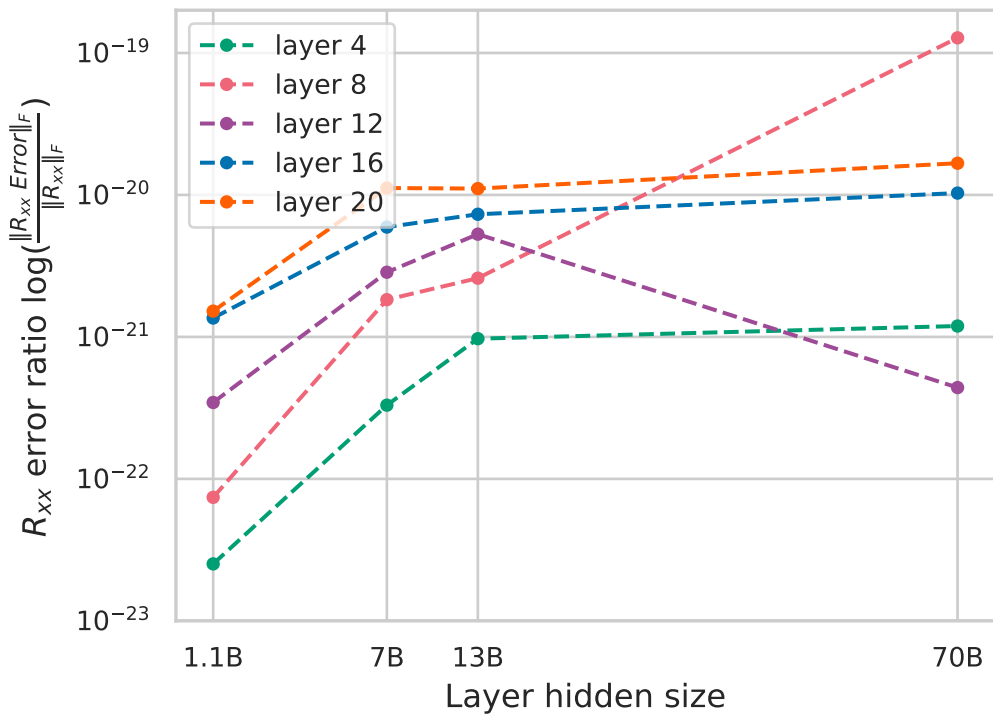

Supplement: supplementary_material [file attachment]

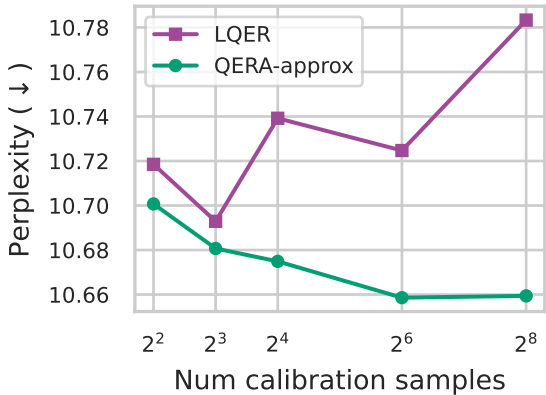

Supplement: supplementary_material [file attachment]

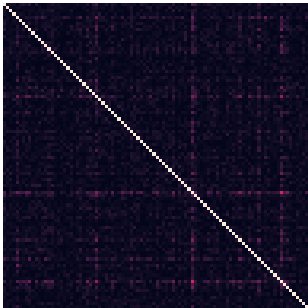

Supplement: supplementary_material [file attachment]

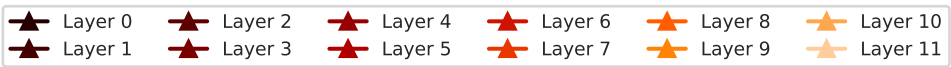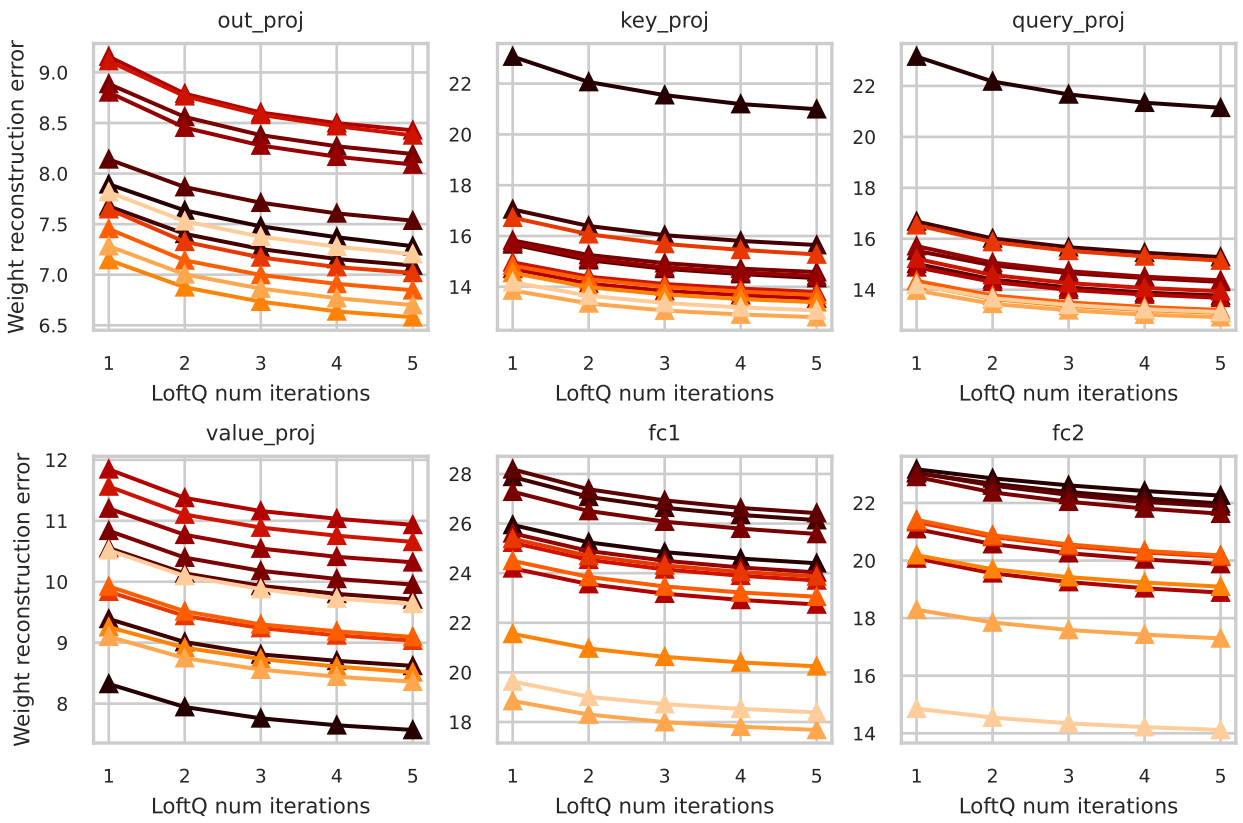

Supplement: supplementary_material [file attachment]

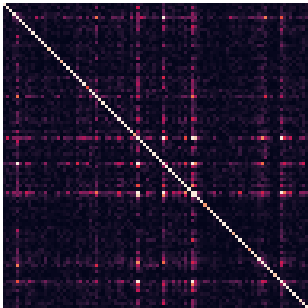

Supplement: supplementary_material [file attachment]

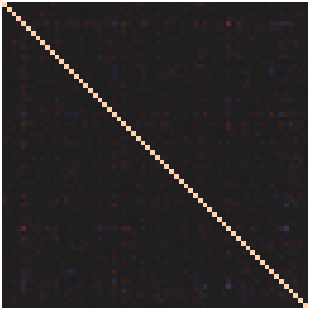

Supplement: supplementary_material [file attachment]

down\_proj (Layer 0)

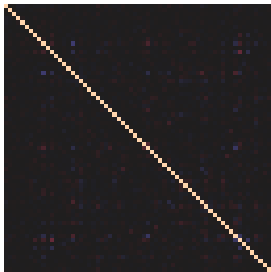

down\_proj (Layer 3)

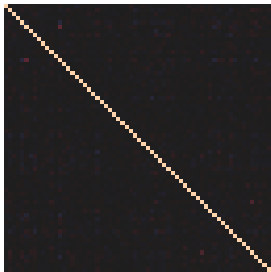

down\_proj (Layer 7)

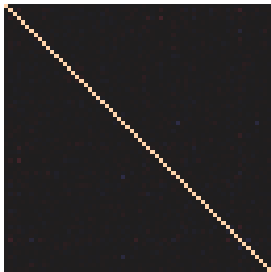

down\_proj (Layer 11)

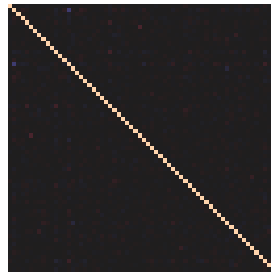

down\_proj (Layer 15)

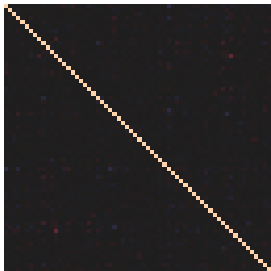

down\_proj (Layer 19)

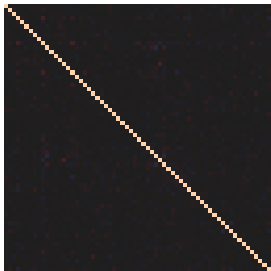

Supplement: supplementary_material [file attachment]

Model output error

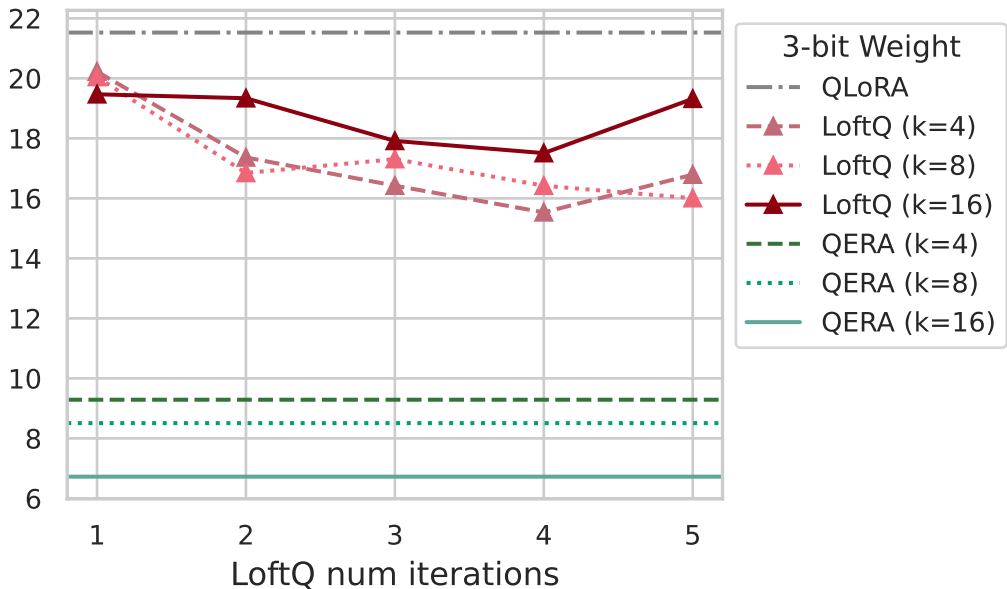

Supplement: supplementary_material [file attachment]

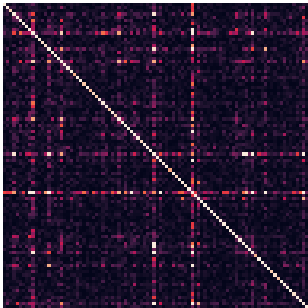

Supplement: supplementary_material [file attachment]

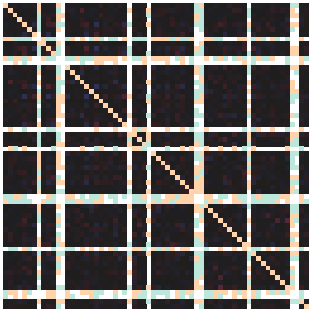

Supplement: supplementary_material [file attachment]

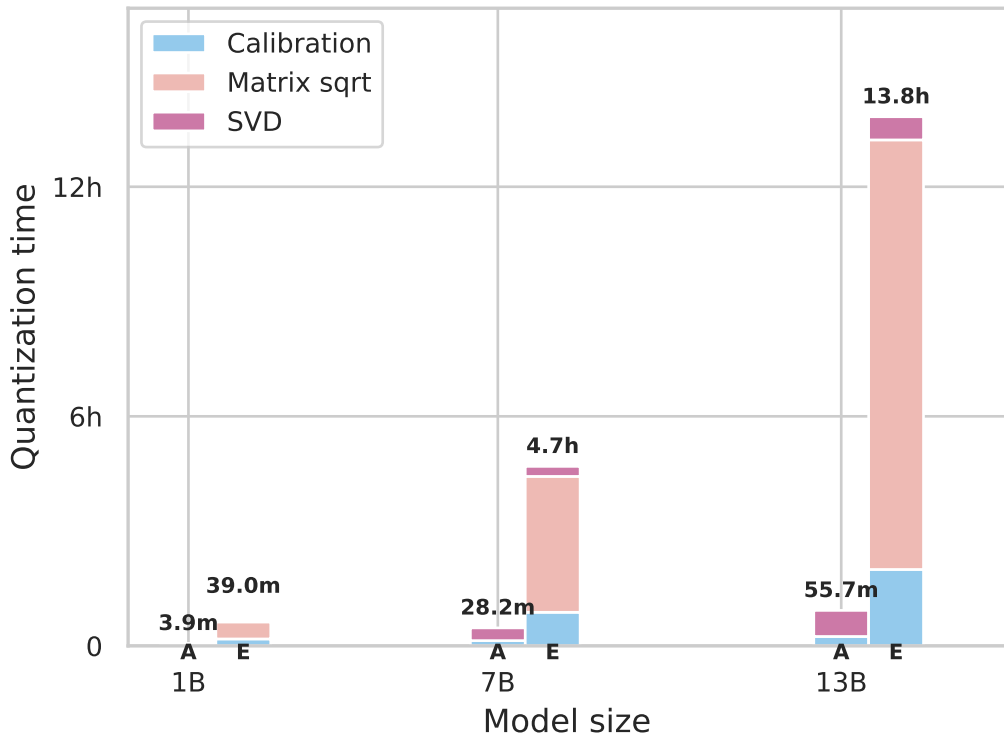

Supplement: supplementary_material [file attachment]

gate\_proj (Layer 0)

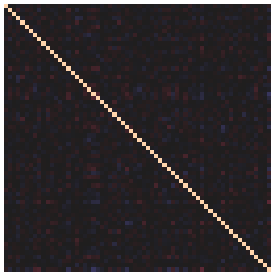

gate\_proj (Layer 3)

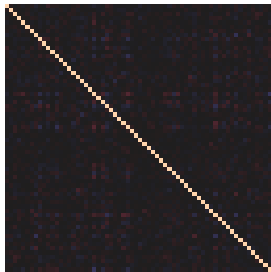

gate\_proj (Layer 7)

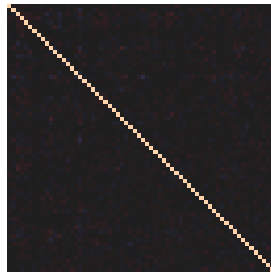

gate\_proj (Layer 11)

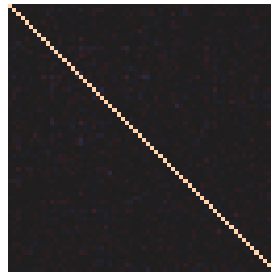

gate\_proj (Layer 15)

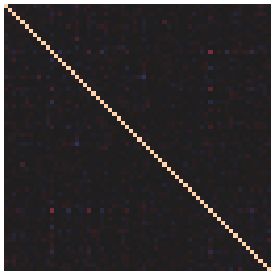

gate\_proj (Layer 19)

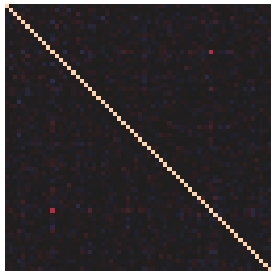

Supplement: supplementary_material [file attachment]

Model output error

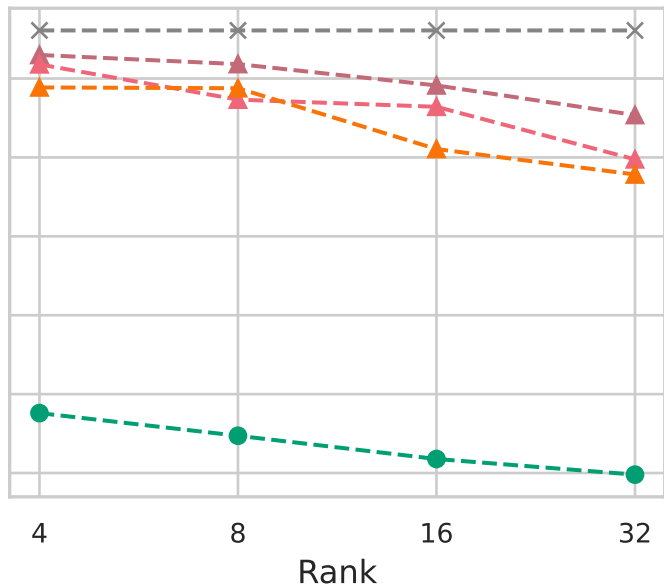

4-bit Weight

- ×— QLoRA
- ▲— LoftQ (1-iter)
- ▲— LoftQ (3-iter)
- ▲— LoftQ (5-iter)
- QERA

Supplement: supplementary_material [file attachment]

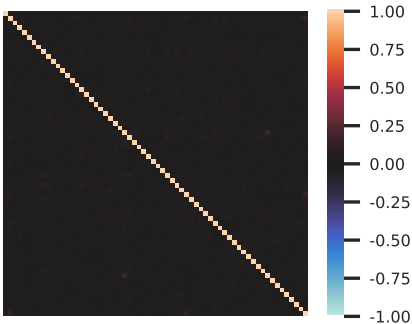

Supplement: supplementary_material [file attachment]

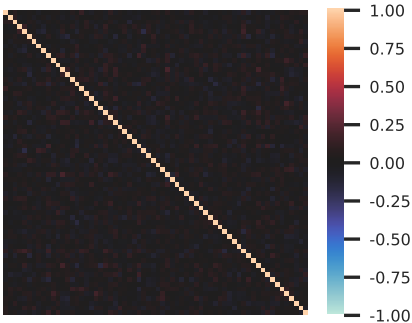

Supplement: supplementary_material [file attachment]
